# Supplementary material for: The Ancient Link between G-Protein-Coupled Receptors and C-Terminal Phospholipid Kinase Domains
Source: PubMed Central journal article supplement (PMC5784254; doi:10.1128/mbio.02119-17), 2018-01-23

Non-oomycetes  
Oomycetes

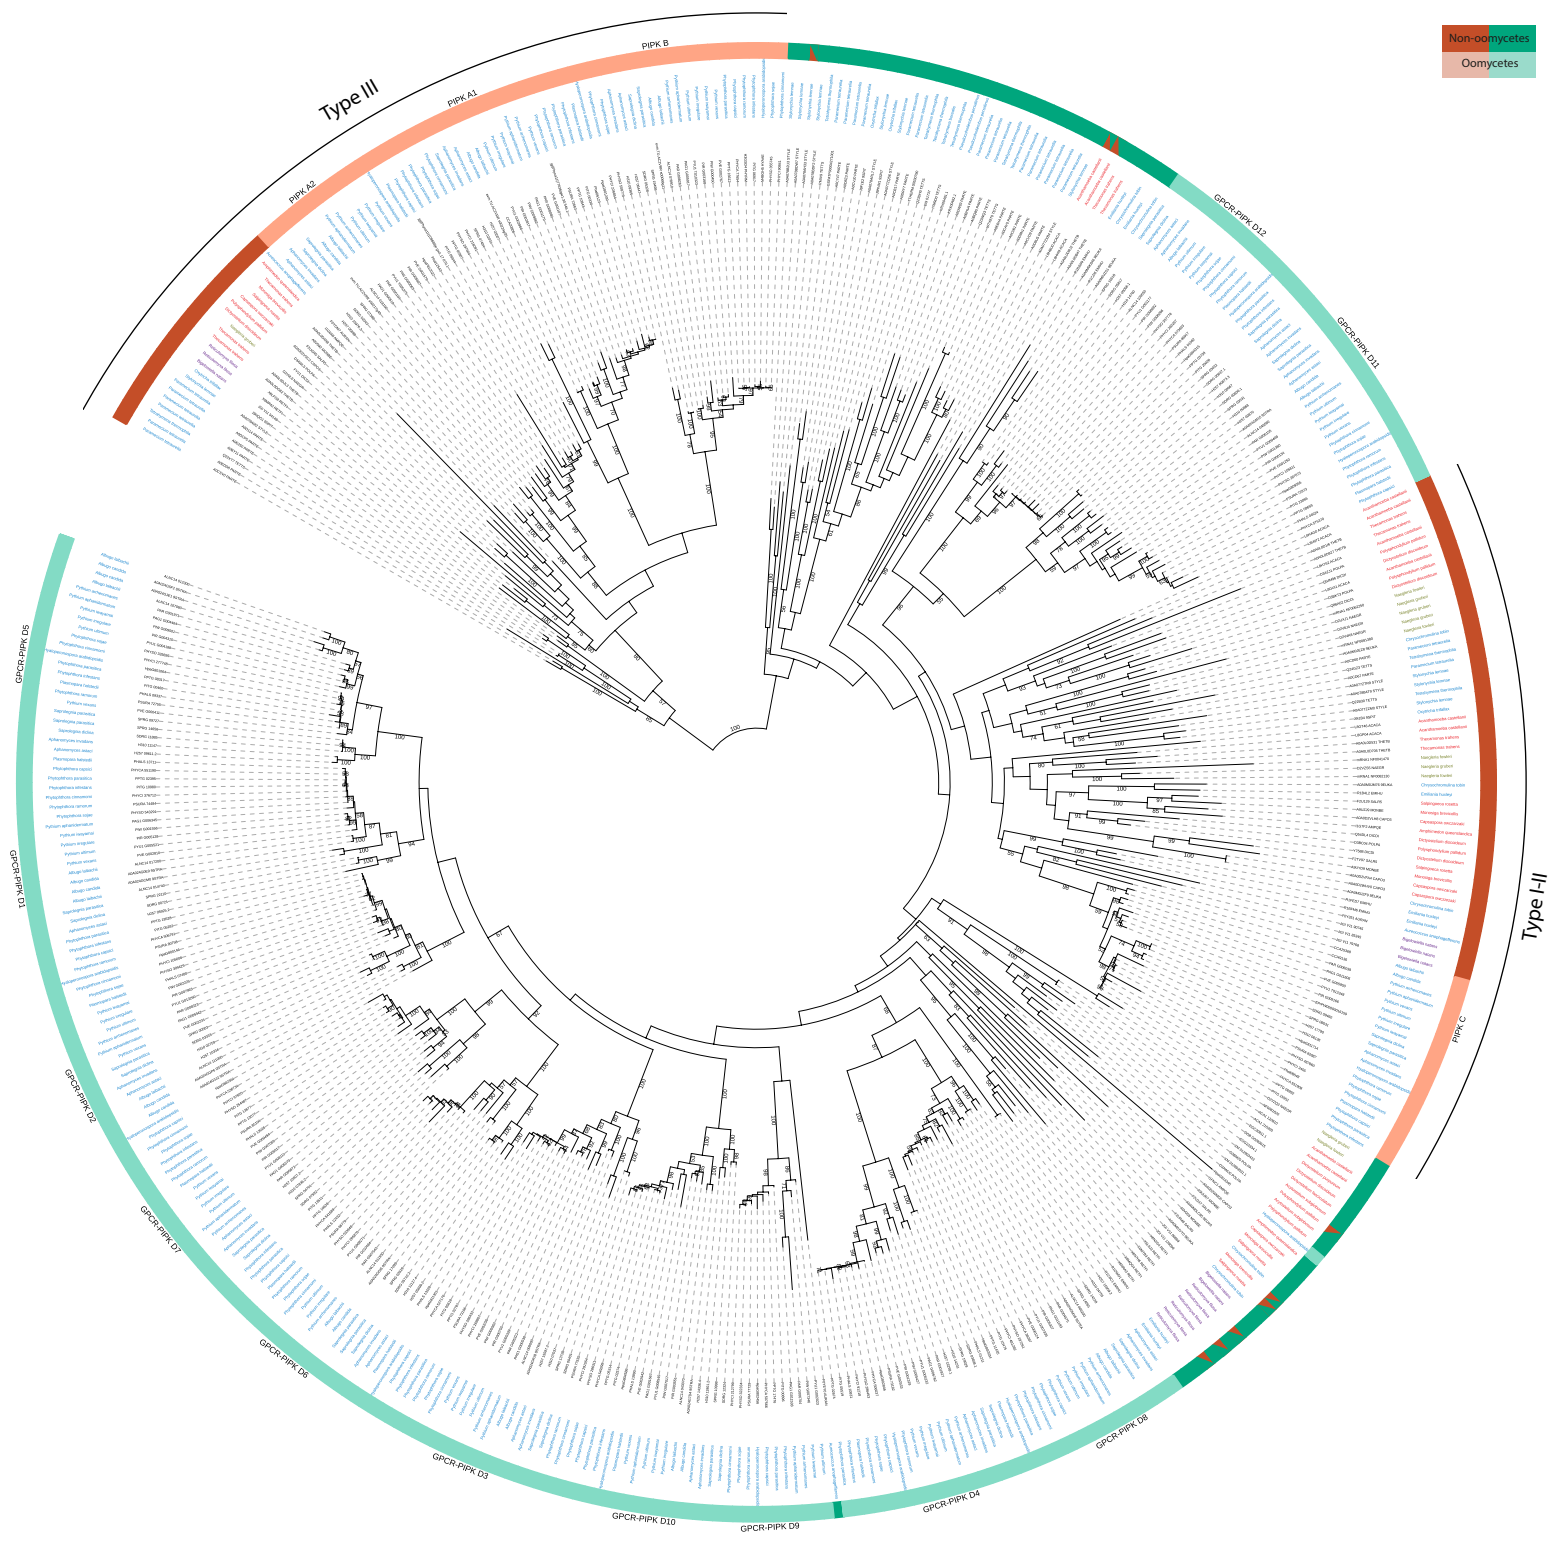

Supplement: mbo001183681sf2.pdf [file mbo001183681sf2.pdf]
